# Supplementary material for: Effects of disturbances and environmental changes on an aridland riparian generalist
Source: PeerJ journal article supplement (doi:10.7717/peerj.15563), 2023-06-19

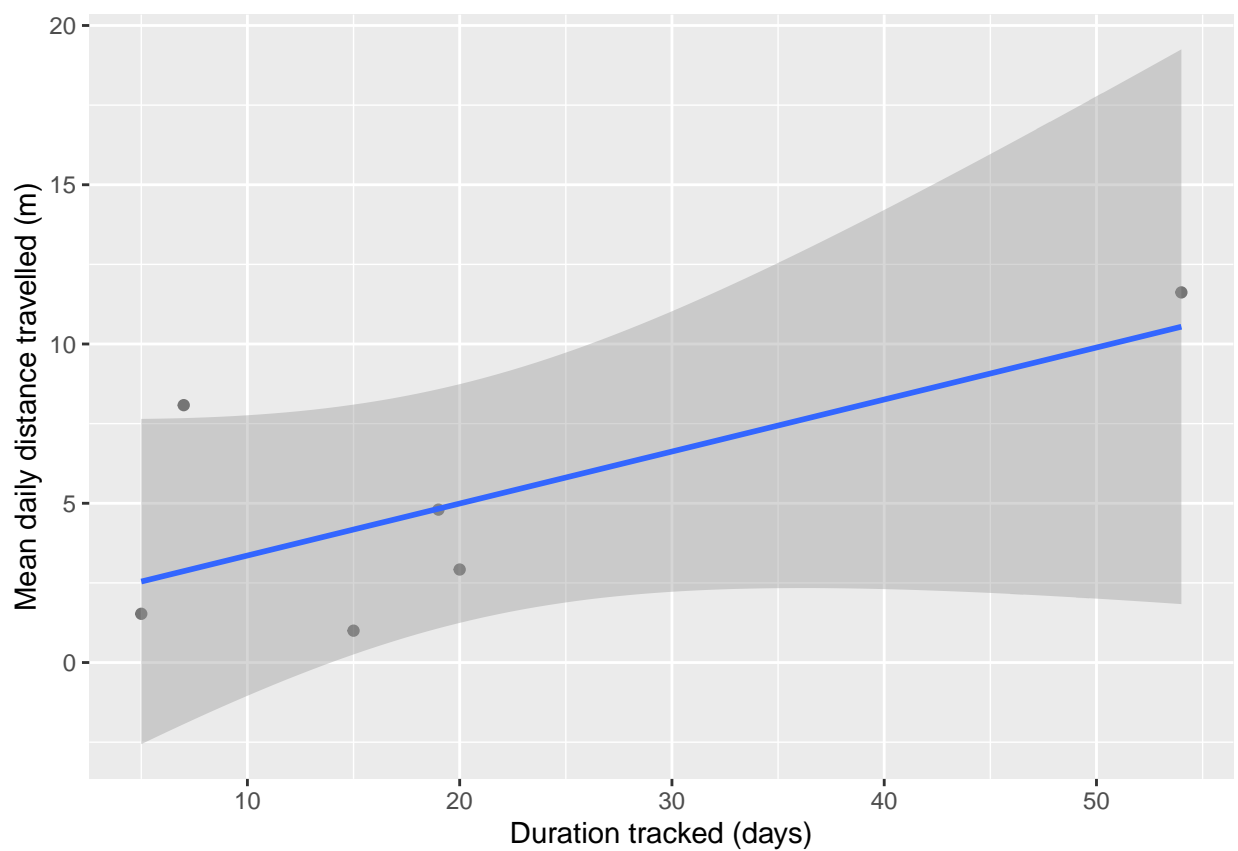

Supplement: FigureS3.pdf [file FigureS3.pdf]
