# Supplementary material for: Effects of disturbances and environmental changes on an aridland riparian generalist
Source: PeerJ. 2023 Jun 19;11:e15563. doi: 10.7717/peerj.15563 (PMC10286802; doi:10.7717/peerj.15563)
Supplement: Supplemental Information 10 — Datasets are sorted by sheets. A key of variables and descriptions is included. [file peerj-11-15563-s010.xlsx]

## Sheet: KEY
Sheet/variable	Levels/description
sheet = THCY_surveys	Survey-level data for Thamnophis cyrtopsis (THCY)
date	is date of survey in format: 01-JAN-2018
season	0 = pre-monsoon (January–June); 1 = monsoon (July–September); 2 = post-monsoon (October–December)
season.2	dry = pre-monsoon & post-monsoon; wet = monsoon
n.obs	is the total number of observers
begin	is the survey starting time
end	is the survey ending time
dur.min	survey duration (minutes)
pres	presence of THCY during survey (0 = absence; 1 = presence)
n.THCY	number of THCY observed, excluding telemetry
n.telem	number of THCY tracked via telemetry
TA0	survey-starting ambient temperature (±0.1°C)
TA1	survey-ending ambient temperature (±0.1°C)
RH0	survey-starting relative humidity (±0.1%)
RH1	survey-ending relative humidity (±0.1%)
BP0	survey-starting barometric pressure (±0.1mb)
BP1	survey-ending barometric pressure (±0.1mb)
wind0	survey-starting mean wind speed (±0.1m/s)
wind1	survey-ending mean wind speed (±0.1m/s)
clouds	0 = clear; 1 = few clouds; 2 = partly/scattered clouds; 3 = cloudy/overcast (>75% clouds)
rain	0 = No precipitation in the last 24 hours; 1 = Rain evidence within past 24 hours, including current; 2 = currently raining
Stream	max stream flow (m3/s) during survey window; data obtained from https://waterdata.usgs.gov/monitoring-location/09484000/
sheet = THCY_plotting	Geolocations of Thamnophis cyrtopsis via telemetry and single observations
idx	arbitrary field code
date	date of observation
time	time of observation
season	0 = pre-monsoon (January–June); 1 = monsoon (July–September); 2 = post-monsoon (October–December)
ageclass	is developmental age-class: < 200 mm SVL = neonates; females > 411 mm and males > 337 mm SVL = mature adults; and intermediate SVL sizes = immature/subadults (Jones and Hensley 2020)
detection	Detection method used. Telemetry = “external tape” radio telemetry; VES = visual encounter survey
datum	Spatial: datum
lat	Spatial: Latitude in decimal degrees
lon	Spatial: Longitude in decimal degrees
zone	Spatial: UTM zone
easting	Spatial: UTM Easting
northing	Spatial: UTM Northing
error (m)	Spatial: GPS error (meters)
sheet = THCY_telem	Telemetry tracking of Thamnophis cyrtopsis
id	Individual identifyer (e.g., THCY008_f = Thamnophis cyrtopsis #8, female)
date	date of telemetry observation
time	time of telemetry observation
datum	Spatial: datum
lat	Spatial: Latitude in decimal degrees
lon	Spatial: Longitude in decimal degrees
zone	Spatial: UTM zone
easting	Spatial: UTM Easting
northing	Spatial: UTM Northing
error (m)	Spatial: GPS error (meters)
sheet = THCY_MH_BEH	Microhabitat use and behavior of Thamnophis cyrtopsis
IDx	arbitrary field code
ID	Identifyer type: Individual ID (e.g., THCY005) or single observation (single)
date	date of observation
time	time of observation
season	0 = pre-monsoon (January–June); 1 = monsoon (July–September); 2 = post-monsoon (October–December)
season.2	dry = pre-monsoon & post-monsoon; wet = monsoon
ageclass	is developmental age-class: < 200 mm SVL = neonates; females > 411 mm and males > 337 mm SVL = mature adults; and intermediate SVL sizes = immature/subadults (Jones and Hensley 2020)
detection	Detection method used. Telemetry = “external tape” radio telemetry; VES = visual encounter survey
surface	0 = below surface/underground; 1 = snake is above ground or in water
active	0 = inactive snake (not moving, underground); 1 = active behavior (e.g., moving, foraging, in water)
easting	Spatial: UTM Easting
northing	Spatial: UTM Northing
error (m)	Spatial: GPS error (meters)
TA	is the ambient temperature ca. 1-2 m above ground (±0.1°C)
RH	is the relative humidity ca. 1-2 m above ground (±0.1%)
BP	is the barometric pressure ca. 1-2 m above ground (±0.1 mb)
wind	is the mean wind ca. 1-2 m above ground (±0.1 m/s)
clouds	0 = clear; 1 = few clouds; 2 = partly/scattered clouds; 3 = cloudy/overcast (>75% clouds)
rain	is the precipitation estimate at point of observation: 0 = none; 1 = rain evidence in past 24h; 2 = actively raining
cover	Vegetation height at 1 m microhabitat plots. none = no cover (open exposure); low = height <1 m height; mid = height 1–2 m; high = height >2 m.
barren	est. % of ground cover composition at 1 m diameter at location site
rock	est. % of ground cover composition at 1 m diameter at location site (e.g., sand–boulder/bedrock)
water	est. % of ground cover composition at 1 m diameter at location site
woody debris	est. % of ground cover composition at 1 m diameter at location site; e.g., detritus, plant litter, twigs/brush piles
grasses/forbs	est. % of ground cover composition at 1 m diameter at location site
shrubs	est. % of ground cover composition at 1 m diameter at location site
trees/roots	est. % of ground cover composition at 1 m diameter at location site; including exposed/eroded root systems
mean.can	Mean percentage of four radial readings (i.e., NESW) of 17-point densiometer
shade	estimated percentage (±0.25) of shade within 1m diameter of observation location
d.H2Obin	Distance bins (m) from observation to nearest surface water, when applicable. a = 0 m (i.e., in water); b < 1 m; c = 1–5 m; d > 5 m
silt	0 = not observed; 1 = observed | finer than dirt/sand
sand/bare soil	0 = not observed; 1 = observed | < 0.3 cm diameter
gravel	0 = not observed; 1 = observed | 0.3-7.6 cm diameter
cobble	0 = not observed; 1 = observed | 7.6 – 61 cm diameter
boulder	0 = not observed; 1 = observed | > 61cm diameter
bedrock	0 = not observed; 1 = observed | Bedrock/Rock Outcrop slab
eddy/isolated pool	0 = not observed; 1 = observed | eddies or pools with backwater; isolated pools
plunge pool	0 = not observed; 1 = observed | Formed where water falls over a boulder or log
glide/run	0 = not observed; 1 = observed | Slow moving areas in the stream, where the surface is smooth.
riffle	0 = not observed; 1 = observed | Swift, flowing water, where the surface is turbulent.
bank	0 = not observed; 1 = observed | Just out of water on stream bank
edge	0 = not observed; 1 = observed | atedge of water and bank (e.g., half in or out)
drybed	0 = not observed; 1 = observed | surface-dry stream channel
depth	water column depth (cm) at location where snake observed
d.shore	distance in meters (±0.25) to nearest shoreline from placement in water
alertness	0 = not observed; 1 = observed | Immobile but demonstrates alertness, including scoping or head turning, tongue flicking, or demonstrates imminent fleeing
movement	0 = not observed; 1 = observed | Active terrestrial locomotion of any speed
water use	0 = not observed; 1 = observed | Individual is in water, including active swimming or passive floating
foraging	0 = not observed; 1 = observed | Includes active foraging (i.e., hunting pursuit), eating, or evidence of recent meal (e.g., bolus bulge, regurgitation)
inactive	0 = not observed; 1 = observed | Not demonstrating any active behaviors (e.g., appears at rest)
sheet = THCY_size	Measured body sizes of Thamnophis cyrtopsis
age	is developmental age-class: < 200 mm SVL = neonates; females > 411 mm and males > 337 mm SVL = mature adults; and intermediate SVL sizes = immature/subadults (Jones and Hensley 2020)
sex	If probed, M = male; F = female; else = undetermined {neonates not attempted}
SVL (mm)	measured snout-vent length (mm)
mass (g)	weighed mass (g)
logM/logSVL	Body condition index (see Stevenson & Woods, 2006)
tail (mm)	measured post-anal tail length (mm)

## Sheet: THCY_surveys
date	season	season.2	n.obs	begin	end	dur.min	pres	n.THCY	n.telem	TA0	TA1	RH0	RH1	BP0	BP1	wind0	wind1	clouds	rain	streamflow (m3)
2018-07-13	1	wet	2	09:00:00	12:30:00	210	1	3	NA	29.2	33.6	41	32	NA	NA	1.4	2.4	1	0	0.487
2018-08-01	1	wet	2	09:00:00	12:00:00	180	1	1	NA	30.7	35.6	45	30	NA	NA	1.7	1.9	NA	0	0.037
2018-08-10	1	wet	2	09:30:00	13:00:00	210	1	1	NA	26.8	29.9	59	47	NA	NA	0.5	4.3	NA	0	0
2018-10-25	2	dry	2	09:30:00	12:30:00	180	1	1	NA	21.6	24.6	40	37	NA	NA	0.6	1.4	NA	0	0.176
2019-03-05	0	dry	4	15:00:00	18:00:00	180	0	0	NA	NA	NA	NA	NA	NA	NA	NA	NA	NA	NA	2.183
2019-06-25	0	dry	1	08:30:00	13:20:00	290	1	6	NA	35.2	37	19.4	14.1	921	919.1	0	0.7	0	0	0
2019-06-27	0	dry	2	07:55:00	12:20:00	265	1	2	NA	30	38.2	26.7	17.7	924.3	923.3	0	0.6	0	0	0
2019-06-28	0	dry	2	08:10:00	12:45:00	275	1	3	NA	32.7	40.5	19.4	16.2	923.2	921.4	0.3	0.9	2	1	0
2019-07-02	1	wet	1	10:00:00	12:45:00	165	1	5	2	34.4	37.6	26.5	19.6	921.7	920.4	0.9	0.8	0	0	0
2019-07-03	1	wet	2	08:15:00	13:45:00	330	1	7	2	30	37.9	30.9	13.4	921.4	918.7	0.8	0.4	0	0	0
2019-07-08	1	wet	1	10:00:00	13:00:00	180	1	10	3	NA	NA	NA	NA	NA	NA	NA	NA	0	1	0
2019-07-10	1	wet	3	08:00:00	13:00:00	300	1	6	3	28.5	38	37.4	14.1	924.7	923.2	0	1.7	1	0	0
2019-07-11	1	wet	3	08:00:00	12:40:00	280	1	7	2	29.7	39.8	39.7	19.6	923.7	921.5	0	0.7	2	0	0
2019-07-12	1	wet	2	09:45:00	12:30:00	165	1	8	2	34.3	36.1	26.1	23.9	920.7	919.5	0	0	2	0	0
2019-07-18	1	wet	2	08:10:00	12:30:00	260	1	6	1	29.8	36.4	46.7	33.6	923.2	920.8	0.6	1.4	2	0	0
2019-07-24	1	wet	2	08:00:00	10:00:00	120	1	4	1	NA	NA	NA	NA	NA	NA	NA	NA	2	1	0
2019-07-25	1	wet	3	08:00:00	12:00:00	240	1	5	1	28	34.1	54.2	44.5	924.6	923.3	0	0.6	1	1	0
2019-08-01	1	wet	3	08:00:00	11:40:00	220	1	5	1	30.9	34.2	56.1	40.7	924.8	923.9	0.3	0.5	0	1	0
2019-08-07	1	wet	2	08:00:00	09:30:00	90	1	1	NA	29.6	31.6	57	45.5	923.4	923.1	0	0.8	1	1	0
2019-08-08	1	wet	3	16:30:00	21:00:00	270	1	3	1	33.5	NA	34.9	NA	918.7	NA	0.9	NA	3	0	0
2019-08-21	1	wet	2	07:50:00	11:00:00	190	1	2	1	31.8	35.5	41.1	31.3	920.5	920.3	0.1	0.5	1	0	0
2019-08-22	1	wet	2	08:00:00	11:00:00	180	1	3	1	32.3	34	40.9	37.7	920.2	917.7	0	0.3	0	0	0
2019-08-23	1	wet	1	10:00:00	11:00:00	60	NA	NA	1	31.4	32.5	41	47.7	922.4	920.9	0.9	0	1	0	0
2019-08-28	1	wet	2	16:30:00	17:00:00	30	NA	NA	1	33.5	NA	36.6	NA	920.9	NA	0.4	NA	3	1	0
2019-09-05	1	wet	2	16:30:00	19:15:00	165	0	0	1	36.3	33.5	26	29.1	921.2	922.2	0.8	0	2	0	0
2019-09-10	1	wet	2	18:30:00	20:10:00	100	1	2	1	30.7	29.4	38.5	44	918.1	919.9	0.8	0.4	1	0	0.147
2019-09-17	1	wet	2	18:15:00	20:00:00	105	0	0	1	28.8	26.5	50.7	53.5	919.9	920	0	0	0	0	0.011
2019-09-18	1	wet	2	08:15:00	12:30:00	255	1	1	1	27.3	30.3	52.6	46.7	922.3	920.5	0	0	0	0	0.011
2019-09-19	1	wet	2	16:15:00	19:50:00	215	1	1	1	34.4	27.8	24	52.8	916	914.1	1.3	0	2	0	0.006
2019-09-20	1	wet	2	08:40:00	13:00:00	260	1	4	2	27	35.9	28	22.6	920.2	917.3	0.5	0.2	1	0	0.006
2019-09-26	1	wet	1	17:00:00	19:00:00	120	NA	NA	1	25.8	24.8	60.7	59.1	918.9	918.4	0.4	0.1	1	1	0.008
2019-10-03	2	dry	2	17:15:00	21:15:00	240	NA	NA	2	25.1	NA	62.8	NA	935.1	NA	0	NA	0	0	0.017
2019-10-04	2	dry	2	07:05:00	11:05:00	240	NA	NA	2	23.3	NA	62.1	NA	923	NA	0.1	NA	3	0	0.017
2019-10-10	2	dry	1	16:40:00	20:40:00	240	NA	NA	2	34.5	NA	29.5	NA	917.8	NA	0.2	NA	0	0	0.008
2019-10-18	2	dry	2	09:45:00	13:15:00	210	1	1	2	25.1	29	52.3	29.1	918.3	916.7	0.5	0.2	2	0	0
2019-10-25	2	dry	1	12:00:00	13:40:00	100	NA	NA	2	24.2	27.4	11.1	11.9	925.5	923.1	1.3	0.4	0	0	0
2019-10-29	2	dry	2	10:20:00	13:00:00	160	0	0	1	20.3	22.9	24.1	18.8	920.3	917.5	0.3	1.4	0	0	0
2019-11-07	2	dry	3	15:30:00	17:30:00	120	1	2	1	26.2	24.7	36.2	42.5	924.6	922.7	0.4	0	1	1	0
2019-11-12	2	dry	1	12:20:00	14:00:00	100	NA	NA	1	22.9	24.6	30.4	31.2	925.4	921.5	1.5	0.7	0	0	0
2020-02-07	0	dry	2	09:30:00	14:00:00	270	0	0	NA	15.1	21.6	34.9	21.3	925.7	923.2	0.3	0.5	0	0	0.161
2020-02-21	0	dry	2	09:50:00	13:10:00	200	0	0	NA	19.3	22.7	45.8	38.7	928.6	925.8	0.4	0.6	3	1	0.113
2020-03-06	0	dry	2	09:30:00	13:10:00	220	0	0	NA	25.5	27.1	22.4	22.3	926.6	924.6	1.2	1	0	0	0.19
2020-04-03	0	dry	1	08:30:00	12:30:00	240	0	0	NA	21.7	28.5	31.5	16.8	920.4	915.1	0.2	1.1	0	0	0.272
2020-04-08	0	dry	1	08:20:00	12:00:00	220	1	1	NA	21.3	27.5	42.2	24.8	923.1	921.9	1	1.4	2	0	0.15
2020-09-25	1	wet	1	08:20:00	10:48:00	148	0	0	NA	29	35.6	31.2	22.2	923.9	923.5	0.3	0.4	0	0	0
2020-10-05	2	dry	2	07:50:00	11:00:00	190	0	0	NA	23.1	28.1	20.4	26.3	926	925.3	0.1	0	0	0	0
2020-10-12	2	dry	2	07:45:00	10:20:00	155	0	0	NA	19.8	24.8	34.5	28	925.8	922	0	0.1	0	0	0
2020-10-23	2	dry	2	09:10:00	11:30:00	140	0	0	NA	24.5	32.5	45.5	25.8	923.7	920.6	0	0	0	0	0
2021-05-17	0	dry	2	08:30:00	11:40:00	190	0	0	NA	25.8	25.9	23.9	19.5	920.7	919.5	0.3	0.5	0	0	0
2021-05-20	0	dry	2	08:00:00	11:00:00	180	0	0	NA	27.6	32.6	27.7	25.3	919	915.2	0.2	0	0	0	0
2021-05-31	0	dry	2	08:00:00	10:15:00	135	0	0	NA	25.1	31.3	34.6	32.7	922.9	919	0.6	0.4	0	0	0
2021-06-10	0	dry	2	20:20:00	21:20:00	60	0	0	NA	26.1	24.1	21.7	31.6	918.9	918.1	0	0	NA	0	0
2021-06-29	0	dry	2	08:10:00	10:00:00	110	0	0	NA	28.3	32.6	38.8	35.3	920.3	917.8	0.3	0.9	NA	0	0
2021-07-07	1	wet	3	08:20:00	10:00:00	100	1	2	NA	32	34.6	51	44.4	921.1	918.5	0	0	1	0	0
2021-07-13	1	wet	2	08:20:00	10:42:00	142	1	2	NA	27.7	37.9	55.4	36.7	924	924.4	0	0	0	0	0
2021-07-22	1	wet	9	19:30:00	21:30:00	120	0	0	NA	NA	NA	NA	NA	NA	NA	NA	NA	3	1	0
2021-07-27	1	wet	2	08:10:00	10:45:00	155	0	0	NA	27.8	33.7	60.4	47	924.7	925	0	0.8	0	1	1.47
2021-08-20	1	wet	1	08:30:00	10:00:00	90	0	0	NA	29.8	34.8	62.4	50.6	921.1	921.7	0	0.4	0	0	2.189
2021-09-03	1	wet	5	08:15:00	11:00:00	165	0	0	NA	28.2	37	58.8	49	922.4	919.1	0	0.4	1	0	1.506
2021-09-10	1	wet	1	19:58:00	21:48:00	110	0	0	NA	25.7	33.2	45.2	41.7	925	925	0	0	0	0	0.255
2021-09-17	1	wet	2	08:00:00	12:00:00	240	0	0	NA	26	32.4	57.3	45.3	923.7	924.8	0	0.3	3	0	0.119
2021-10-01	2	dry	1	10:15:00	11:46:00	91	0	0	NA	27	34	44	32	925	924	0	1	0	1	0.425
2021-10-05	2	dry	2	08:40:00	12:25:00	225	0	0	NA	24.3	33.6	56.3	38.1	923.6	920.7	0	0	2	0	0.122
2021-10-15	2	dry	1	11:18:00	13:20:00	122	0	0	NA	23.5	26.9	26.2	21	926	924	0	1.2	0	0	0.042
2021-10-22	2	dry	2	09:20:00	13:00:00	220	1	1	NA	21.6	29.6	43.8	32.5	924	921.5	0.4	0	3	0	0.023
2021-10-27	2	dry	1	10:40:00	12:46:00	126	0	0	NA	NA	NA	NA	NA	924	926	0	0	0	0	0.014
2021-11-03	2	dry	1	09:38:00	11:55:00	137	0	0	NA	23.6	25.1	32.2	33.7	925	925	0	0	0	0	0.011
2021-11-12	2	dry	2	09:30:00	13:30:00	240	1	5	NA	20.7	NA	31.1	16	928.3	924.3	0.5	0	0	0	0.008
2021-11-17	2	dry	1	11:15:00	12:55:00	100	0	0	NA	NA	NA	NA	NA	924	925	0	0	3	0	0.006
2021-12-03	2	dry	2	11:10:00	12:45:00	95	0	0	NA	25.2	31.5	36.5	25.1	925.7	921.2	0	0	0	0	0.006
2021-12-08	2	dry	2	10:00:00	13:00:00	180	0	0	NA	18.1	24.8	37.3	29.4	924.9	922.9	0.2	0.8	1	0	0

## Sheet: THCY_plotting
idx	date	time	season	ageclass	detection	datum	lat	lon	zone	easting	northing	error (m)
1_single_neonate	2018-07-13	10:20:00	1	neonate	VES	WGS84	32.3127	-110.811	12S	517780	3575114	4
2_single_neonate	2018-07-13	11:25:00	1	neonate	VES	WGS84	32.315	-110.811	12S	517807	3575363	3
3_single_neonate	2018-07-13	11:58:00	1	neonate	VES	WGS84	32.3159	-110.81	12S	517876	3575468	10
4_single_immature	2018-08-01	11:13:00	1	immature	VES	WGS84	32.3107	-110.811	12S	517834	3574896	3
5_single_adult	2018-08-10	11:00:00	1	adult	VES	WGS84	32.3149	-110.811	12S	517809	3575361	4
6_single_immature	2018-10-25	09:55:00	2	immature	VES	WGS84	32.3173	-110.811	12S	517772	3575621	3
10_single_adult	2019-06-25	09:41:00	0	adult	VES	WGS84	32.315	-110.811	12S	517814	3575373	3
14_single_neonate	2019-06-25	09:45:00	0	neonate	VES	WGS84	32.3158	-110.81	12S	517846	3575451	6
9_THCY001_adult	2019-06-25	09:50:00	0	adult	VES	WGS84	32.3158	-110.81	12S	517846	3575451	3
11_single_adult	2019-06-25	12:10:00	0	adult	VES	WGS84	32.3172	-110.811	12S	517807	3575607	3
12_single_adult	2019-06-25	12:10:00	0	adult	VES	WGS84	32.3172	-110.811	12S	517807	3575607	3
13_single_immature	2019-06-25	12:30:00	0	immature	VES	WGS84	32.3158	-110.81	12S	517846	3575451	3
15_single_adult	2019-06-27	10:00:00	0	adult	VES	WGS84	32.3158	-110.81	12S	517846	3575451	3
16_single_neonate	2019-06-27	11:45:00	0	neonate	VES	WGS84	32.3149	-110.811	12S	517777	3575358	3
21_single_adult	2019-07-02	09:50:00	1	adult	VES	WGS84	32.313	-110.811	12S	517749	3575146	5
22_single_neonate	2019-07-02	11:10:00	1	neonate	VES	WGS84	32.3204	-110.81	12S	517920	3575963	8
23_single_adult	2019-07-02	12:05:00	1	adult	VES	WGS84	32.3195	-110.81	12S	517844	3575866	3
30_single_neonate	2019-07-03	08:45:00	1	neonate	VES	WGS84	32.3161	-110.81	12S	517884	3575486	3
28_single_neonate	2019-07-03	09:07:00	1	neonate	VES	WGS84	32.3181	-110.811	12S	517765	3575706	3
29_single_adult	2019-07-03	12:30:00	1	adult	VES	WGS84	32.3213	-110.81	12S	517843	3575867	5
34_single_neonate	2019-07-08	10:10:00	1	neonate	VES	WGS84	32.3236	-110.806	12S	518229	3576321	3
35_single_neonate	2019-07-08	10:15:00	1	neonate	VES	WGS84	32.3236	-110.807	12S	518141	3576317	3
36_single_neonate	2019-07-08	10:15:00	1	neonate	VES	WGS84	32.3236	-110.807	12S	518141	3576317	3
37_single_neonate	2019-07-08	10:15:00	1	neonate	VES	WGS84	32.3236	-110.807	12S	518141	3576317	3
38_single_neonate	2019-07-08	10:15:00	1	neonate	VES	WGS84	32.3236	-110.807	12S	518141	3576317	3
39_single_neonate	2019-07-08	10:15:00	1	neonate	VES	WGS84	32.3236	-110.807	12S	518141	3576317	3
40_single_neonate	2019-07-08	12:20:00	1	neonate	VES	WGS84	32.315	-110.811	12S	517814	3575373	3
44_single_neonate	2019-07-11	08:25:00	1	neonate	VES	WGS84	32.3159	-110.81	12S	517856	3575472	8
42_THCY006_adult	2019-07-11	08:45:00	1	adult	VES	WGS84	32.3182	-110.811	12S	517776	3575719	3
45_single_neonate	2019-07-11	08:45:00	1	neonate	VES	WGS84	32.3182	-110.811	12S	517773	3575721	7
46_single_neonate	2019-07-11	08:45:00	1	neonate	VES	WGS84	32.3182	-110.811	12S	517773	3575721	7
43_THCY007_adult	2019-07-11	11:30:00	1	adult	VES	WGS84	32.3194	-110.81	12S	517843	3575860	3
47_single_neonate	2019-07-12	10:00:00	1	neonate	VES	WGS84	32.3161	-110.81	12S	517876	3575491	3
48_single_neonate	2019-07-12	10:00:00	1	neonate	VES	WGS84	32.3161	-110.81	12S	517876	3575491	3
49_single_neonate	2019-07-12	10:30:00	1	neonate	VES	WGS84	32.3182	-110.811	12S	517783	3575718	3
50_single_neonate	2019-07-12	10:30:00	1	neonate	VES	WGS84	32.3182	-110.811	12S	517783	3575718	3
51_single_neonate	2019-07-12	10:40:00	1	neonate	VES	WGS84	32.3194	-110.81	12S	517843	3575860	3
52_single_neonate	2019-07-12	10:40:00	1	neonate	VES	WGS84	32.3194	-110.81	12S	517843	3575860	3
53_single_neonate	2019-07-12	10:40:00	1	neonate	VES	WGS84	32.3194	-110.81	12S	517843	3575860	3
54_single_neonate	2019-07-12	10:40:00	1	neonate	VES	WGS84	32.3194	-110.81	12S	517843	3575860	3
55_single_neonate	2019-07-18	08:30:00	1	neonate	VES	WGS84	32.3182	-110.811	12S	517776	3575719	3
56_single_neonate	2019-07-18	11:45:00	1	neonate	VES	WGS84	32.3194	-110.81	12S	517843	3575860	3
57_single_neonate	2019-07-25	09:30:00	1	neonate	VES	WGS84	32.3194	-110.81	12S	517843	3575860	3
58_single_neonate	2019-07-25	09:30:00	1	neonate	VES	WGS84	32.3194	-110.81	12S	517843	3575860	3
59_single_neonate	2019-07-25	10:30:00	1	neonate	VES	WGS84	32.3175	-110.811	12S	517764	3575643	5
60_single_neonate	2019-08-01	08:30:00	1	neonate	VES	WGS84	32.3182	-110.811	12S	517776	3575719	3
61_single_neonate	2019-08-01	08:30:00	1	neonate	VES	WGS84	32.3182	-110.811	12S	517776	3575719	3
62_single_neonate	2019-08-01	10:00:00	1	neonate	VES	WGS84	32.3235	-110.808	12S	518075	3576305	10
63_single_neonate	2019-08-01	10:00:00	1	neonate	VES	WGS84	32.3235	-110.808	12S	518075	3576305	10
64_single_neonate	2019-08-01	10:00:00	1	neonate	VES	WGS84	32.3235	-110.808	12S	518075	3576305	10
65_single_neonate	2019-08-07	09:00:00	1	neonate	VES	WGS84	32.3194	-110.81	12S	517843	3575860	3
66_single_neonate	2019-08-08	18:45:00	1	neonate	VES	WGS84	32.3261	-110.805	12S	518355	3576602	3
67_single_neonate	2019-08-08	18:45:00	1	neonate	VES	WGS84	32.3261	-110.805	12S	518355	3576602	3
68_single_neonate	2019-08-08	18:49:00	1	neonate	VES	WGS84	32.3258	-110.805	12S	518399	3576571	3
74_single_neonate	2019-08-21	09:45:00	1	neonate	VES	WGS84	32.3182	-110.811	12S	517776	3575719	3
75_single_neonate	2019-08-21	09:45:00	1	neonate	VES	WGS84	32.3182	-110.811	12S	517776	3575719	3
77_single_neonate	2019-08-22	10:45:00	1	neonate	VES	WGS84	32.3143	-110.811	12S	517753	3575295	3
81_single_immature	2019-09-10	19:20:00	1	immature	VES	WGS84	32.316	-110.81	12S	517880	3575481	25
82_single_neonate	2019-09-10	20:00:00	1	neonate	VES	WGS84	32.3143	-110.811	12S	517753	3575295	5
83_THCY009_adult	2019-09-18	10:50:00	1	adult	VES	WGS84	32.3174	-110.811	12S	517760	3575635	5
87_THCY011_adult	2019-09-20	08:50:00	1	adult	VES	WGS84	32.314	-110.811	12S	517751	3575259	3
85_THCY006_adult	2019-09-20	11:00:00	1	adult	VES	WGS84	32.3197	-110.81	12S	517872	3575885	3
88_THCY012_adult	2019-09-20	11:00:00	1	adult	VES	WGS84	32.3197	-110.81	12S	517872	3575885	3
95_single_neonate	2019-10-18	09:45:00	2	neonate	VES	WGS84	32.3113	-110.811	12S	517833	3574962	5
94_THCY013_adult	2019-10-18	11:20:00	2	adult	VES	WGS84	32.3186	-110.811	12S	517783	3575766	3
99_THCY012_adult	2019-11-07	16:50:00	2	adult	VES	WGS84	32.3204	-110.81	12S	517903	3575963	9
101_single_adult	2020-04-08	09:45:00	0	adult	VES	WGS84	32.3206	-110.81	12S	517927	3575984	3
104_THCY014_adult	2021-07-07	08:24:00	1	adult	VES	WGS84	32.3148	-110.811	12S	517752	3575347	3
105_single_neonate	2021-07-07	09:55:00	1	neonate	VES	NA	32.3234	-110.808	12S	518073	3576300	6
106_single_neonate	2021-07-13	08:44:00	1	neonate	VES	WGS84	32.3147	-110.811	12S	517753	3575330	3
107_single_neonate	2021-07-13	08:59:00	1	neonate	VES	WGS84	32.3146	-110.811	12S	517756	3575325	3
110_single_adult	2021-10-22	10:40:00	2	adult	VES	WGS84	32.3171	-110.811	12S	517802	3575600	3
111_single_adult	2021-11-12	10:45:00	2	adult	VES	WGS84	32.3192	-110.811	12S	517824	3575837	3
112_single_adult	2021-11-12	11:00:00	2	adult	VES	WGS84	32.3192	-110.811	12S	517824	3575837	3
113_single_adult	2021-11-12	11:15:00	2	adult	VES	WGS84	32.3192	-110.811	12S	517824	3575837	3
114_single_adult	2021-11-12	11:15:00	2	adult	VES	WGS84	32.3192	-110.811	12S	517824	3575837	3
115_single_adult	2021-11-12	12:30:00	2	adult	VES	WGS84	32.3207	-110.81	12S	517905	3575997	3
17_THCY002_adult	2019-06-28	10:30:00	0	adult	Telemetry	WGS84	32.3212	-110.81	12S	517896	3576060	3
18_THCY003_adult	2019-06-28	10:30:00	0	adult	Telemetry	WGS84	32.3212	-110.81	12S	517896	3576060	3
19_THCY002_adult	2019-07-02	11:30:00	1	adult	Telemetry	WGS84	32.3212	-110.81	12S	517887	3576056	5
20_THCY003_adult	2019-07-02	11:45:00	1	adult	Telemetry	WGS84	32.3214	-110.81	12S	517893	3576072	3
26_THCY004_adult	2019-07-03	09:15:00	1	adult	Telemetry	WGS84	32.3191	-110.811	12S	517813	3575819	3
27_THCY005_adult	2019-07-03	10:40:00	1	adult	Telemetry	WGS84	32.3212	-110.81	12S	517894	3576055	3
24_THCY002_adult	2019-07-03	12:00:00	1	adult	Telemetry	WGS84	32.3212	-110.81	12S	517887	3576056	5
25_THCY003_adult	2019-07-03	12:15:00	1	adult	Telemetry	WGS84	32.3214	-110.81	12S	517893	3576072	3
33_THCY005_adult	2019-07-08	10:54:00	1	adult	Telemetry	WGS84	32.3214	-110.81	12S	517896	3576080	3
31_THCY002_adult	2019-07-08	11:15:00	1	adult	Telemetry	WGS84	32.3204	-110.81	12S	517897	3575967	3
32_THCY004_adult	2019-07-08	11:55:00	1	adult	Telemetry	WGS84	32.3186	-110.811	12S	517795	3575768	3
41_THCY004_adult	2019-07-10	12:00:00	1	adult	Telemetry	WGS84	32.3186	-110.811	12S	517784	3575766	3
76_THCY008_adult	2019-08-22	09:30:00	1	adult	Telemetry	WGS84	32.3143	-110.811	12S	517753	3575295	3
78_THCY008_adult	2019-08-23	10:15:00	1	adult	Telemetry	WGS84	32.3143	-110.811	12S	517752	3575288	3
79_THCY008_adult	2019-08-28	16:45:00	1	adult	Telemetry	WGS84	32.3143	-110.811	12S	517752	3575288	10
80_THCY008_adult	2019-09-05	17:20:00	1	adult	Telemetry	WGS84	32.3151	-110.812	12S	517727	3575384	3
84_THCY010_adult	2019-09-19	18:15:00	1	adult	Telemetry	WGS84	32.3196	-110.81	12S	517878	3575882	3
86_THCY010_adult	2019-09-20	12:30:00	1	adult	Telemetry	WGS84	32.3191	-110.81	12S	517879	3575827	3
89_THCY010_adult	2019-09-26	18:30:00	1	adult	Telemetry	WGS84	32.3188	-110.81	12S	517900	3575791	50
90_THCY010_adult	2019-10-03	16:15:00	2	adult	Telemetry	WGS84	32.3201	-110.809	12S	517943	3575928	25
91_THCY010_adult	2019-10-04	08:09:00	2	adult	Telemetry	WGS84	32.32	-110.809	12S	517941	3575927	25
92_THCY010_adult	2019-10-10	17:45:00	2	adult	Telemetry	WGS84	32.319	-110.809	12S	517973	3575811	25
93_THCY010_adult	2019-10-18	12:45:00	2	adult	Telemetry	WGS84	32.3197	-110.81	12S	517921	3575890	10
96_THCY010_adult	2019-10-25	12:55:00	2	adult	Telemetry	WGS84	32.3197	-110.81	12S	517921	3575890	10
97_THCY010_adult	2019-10-29	12:30:00	2	adult	Telemetry	WGS84	32.3197	-110.81	12S	517921	3575890	10
98_THCY010_adult	2019-11-07	17:15:00	2	adult	Telemetry	WGS84	32.3204	-110.81	12S	517903	3575963	10
100_THCY010_adult	2019-11-12	13:50:00	2	adult	Telemetry	NAD83	32.3203	-110.81	12S	517905	3575953	7

## Sheet: THCY_telem
id	date	time	datum	lat	lon	zone	easting	northing	error (m)
THCY002_m	2019-06-28	10:30:00	WGS84	32.3212	-110.81	12	517896	3576060	3
THCY002_m	2019-07-02	11:30:00	WGS84	32.3212	-110.81	12	517887	3576056	5
THCY002_m	2019-07-03	12:00:00	WGS84	32.3212	-110.81	12	517887	3576056	5
THCY002_m	2019-07-08	11:15:00	WGS84	32.3204	-110.81	12	517897	3575967	3
THCY002_m	2019-07-10	11:40:00	WGS84	32.3204	-110.81	12	517897	3575967	3
THCY002_m	2019-07-11	10:30:00	WGS84	32.3204	-110.81	12	517897	3575967	3
THCY002_m	2019-07-12	10:50:00	WGS84	32.3204	-110.81	12	517897	3575967	3
THCY002_m	2019-07-18	11:15:00	WGS84	32.3204	-110.81	12	517897	3575967	3
THCY003_m	2019-06-28	10:30:00	WGS84	32.3212	-110.81	12	517896	3576060	3
THCY003_m	2019-07-02	11:45:00	WGS84	32.3214	-110.81	12	517893	3576072	3
THCY003_m	2019-07-03	12:15:00	WGS84	32.3214	-110.81	12	517893	3576072	3
THCY004_f	2019-07-03	09:15:00	WGS84	32.3191	-110.811	12	517813	3575819	3
THCY004_f	2019-07-08	11:55:00	WGS84	32.3186	-110.811	12	517795	3575768	3
THCY004_f	2019-07-10	12:00:00	WGS84	32.3186	-110.811	12	517784	3575766	3
THCY005_f	2019-07-03	10:40:00	WGS84	32.3212	-110.81	12	517894	3576055	3
THCY005_f	2019-07-08	10:54:00	WGS84	32.3214	-110.81	12	517896	3576080	3
THCY005_f	2019-07-10	11:20:00	WGS84	32.3214	-110.81	12	517896	3576080	3
THCY005_f	2019-07-11	10:45:00	WGS84	32.3214	-110.81	12	517896	3576080	3
THCY005_f	2019-07-12	11:00:00	WGS84	32.3214	-110.81	12	517896	3576080	3
THCY005_f	2019-07-18	10:50:00	WGS84	32.3214	-110.81	12	517896	3576080	3
THCY008_f	2019-08-22	09:30:00	WGS84	32.3143	-110.811	12	517753	3575295	3
THCY008_f	2019-08-23	10:15:00	WGS84	32.3143	-110.811	12	517752	3575288	3
THCY008_f	2019-08-28	16:45:00	WGS84	32.3143	-110.811	12	517752	3575288	10
THCY008_f	2019-09-05	17:20:00	WGS84	32.3151	-110.812	12	517727	3575384	3
THCY008_f	2019-09-10	18:45:00	WGS84	32.3151	-110.812	12	517727	3575384	3
THCY010_m	2019-09-19	18:15:00	WGS84	32.3196	-110.81	12	517878	3575882	3
THCY010_m	2019-09-20	12:30:00	WGS84	32.3191	-110.81	12	517879	3575827	3
THCY010_m	2019-09-26	18:30:00	WGS84	32.3188	-110.81	12	517900	3575791	50
THCY010_m	2019-10-03	16:15:00	WGS84	32.3201	-110.809	12	517943	3575928	25
THCY010_m	2019-10-04	08:09:00	WGS84	32.32	-110.809	12	517941	3575927	25
THCY010_m	2019-10-10	17:45:00	WGS84	32.319	-110.809	12	517973	3575811	25
THCY010_m	2019-10-18	12:45:00	WGS84	32.3197	-110.81	12	517921	3575890	10
THCY010_m	2019-10-25	12:55:00	WGS84	32.3197	-110.81	12	517921	3575890	10
THCY010_m	2019-10-29	12:30:00	WGS84	32.3197	-110.81	12	517921	3575890	10
THCY010_m	2019-11-07	17:15:00	WGS84	32.3204	-110.81	12	517903	3575963	10
THCY010_m	2019-11-12	13:50:00	NAD83	32.3203	-110.81	12	517905	3575953	7

## Sheet: THCY_MH_BEH
Parameters of Thamnophis cyrtopsis observation													Environmental conditions						Microhabitat composition (terrestrial)											Microhabitat substrate rockclass (terrestrial)						Associated stream reach types and parameters (aquatic)									Behavior
IDx	ID	date	time	season	season.2	ageclass	detection	surface	active	easting	northing	error (m)	TA	RH	BP	wind	clouds	rain	cover	barren	rock	water	woody debris	grasses/forbs	shrubs	trees/roots	mean.can	shade	d.H2Obin	silt	sand/bare soil	gravel	cobble	boulder	bedrock	eddy/isolated pool	plunge pool	glide/run	riffle	bank	edge	drybed	depth	d.shore	alertness	movement	water use	foraging	inactive
1	single	2018-07-13	10:20:00	1	wet	neonate	NA	1	1	517780	3575114	4	32.4	39.3	925.2	0	1	0	NA	NA	NA	NA	NA	NA	NA	NA	0	0	a	NA	NA	NA	NA	NA	NA	0	0	1	0	0	0	0	NA	1	0	0	1	0	0
2	single	2018-07-13	11:25:00	1	wet	neonate	NA	1	0	517807	3575363	3	31.7	45.6	923.9	0	1	0	NA	NA	NA	1	NA	NA	NA	NA	NA	1	b	NA	NA	NA	NA	NA	NA	0	0	0	0	1	0	0	NA	1	0	0	0	0	1
3	single	2018-07-13	11:58:00	1	wet	neonate	NA	1	1	517876	3575468	10	31.9	48.8	923.1	0	1	0	NA	NA	NA	NA	NA	NA	NA	NA	0	0	c	NA	NA	NA	1	NA	NA	0	0	0	0	0	0	1	NA	NA	0	0	0	0	0
4	single	2018-08-01	11:13:00	1	wet	immature	NA	1	1	517834	3574896	3	37.1	43.1	923.3	0.8	0	0	low	NA	NA	NA	NA	NA	NA	1	0.5	0.5	b	1	0	1	1	0	0	0	0	1	0	0	0	0	NA	NA	1	1	0	0	0
5	single	2018-08-10	11:00:00	1	wet	adult	NA	1	1	517809	3575361	4	29.2	58.4	923.4	0	1	0	low	NA	NA	NA	NA	NA	NA	NA	0.912	0.75	b	0	1	1	1	0	0	0	0	0	0	1	0	0	NA	NA	0	1	0	0	0
6	single	2018-10-25	09:55:00	2	dry	immature	NA	1	1	517772	3575621	3	20.7	NA	923.6	0.5	0	0	none	0	0	0	0	1	0	0	0	0.75	b	1	1	1	1	0	0	1	0	1	0	0	0	0	NA	NA	0	1	1	0	0
7	single	2019-06-25	09:41:00	0	dry	adult	VES	1	0	517814	3575373	3	NA	NA	NA	NA	0	0	low	0	0	0.5	0	0	0	0.5	NA	1	b	NA	NA	NA	NA	NA	NA	1	0	0	0	0	1	0	NA	0.1	0	0	0	0	1
8	single	2019-06-25	09:45:00	0	dry	neonate	VES	1	1	517846	3575451	6	34	22	918.7	0.2	0	0	none	0	1	0	0	0	0	0	0	0	c	0	1	1	1	1	0	0	0	0	0	0	0	1	NA	5	1	1	NA	0	0
9	THCY001	2019-06-25	09:50:00	0	dry	adult	VES	1	1	517846	3575451	3	34	22	918.7	0.2	0	0	low	0	0	0.5	0	0.25	0	0.25	0.485	0.5	a	0	1	1	1	1	0	1	0	0	0	0	1	0	2.5	0.1	1	0	1	0	0
10	single	2019-06-25	12:10:00	0	dry	adult	VES	1	0	517807	3575607	3	NA	NA	NA	NA	0	0	none	0	0.45	0.45	0	0	0	0.1	NA	1	a	NA	1	1	1	1	0	1	0	0	0	0	1	0	NA	0	1	0	1	1	1
11	single	2019-06-25	12:10:00	0	dry	adult	VES	1	0	517807	3575607	3	NA	NA	NA	NA	0	0	none	0	0.45	0.45	0	0	0	0.1	NA	1	a	NA	1	1	1	1	0	1	0	0	0	0	1	0	NA	0	1	0	1	1	1
12	single	2019-06-25	12:30:00	0	dry	immature	VES	1	1	517846	3575451	3	NA	NA	NA	NA	0	0	low	0	0	0.5	0	0.25	0	0.25	0.485	0.5	a	0	1	1	1	1	0	1	0	0	0	0	1	0	0.25	0.1	1	0	1	0	0
13	single	2019-06-27	10:00:00	0	dry	adult	VES	1	1	517846	3575451	3	NA	NA	NA	NA	NA	NA	low	0	0	0.5	0	0.25	0	0.25	0.485	0.5	a	0	1	1	1	1	0	1	0	0	0	0	1	0	0.25	0.1	1	1	1	NA	0
14	single	2019-06-27	11:45:00	0	dry	neonate	VES	1	1	517777	3575358	3	31.9	28.4	923.7	0	0	0	none	0.2	0.2	0.6	0	0	0	0	0.868	0.5	a	1	0	0	0	0	1	0	1	0	0	0	0	0	13.5	7.8	1	0	1	0	0
15	THCY002	2019-06-28	10:30:00	0	dry	adult	Telemetry	1	1	517896	3576060	3	37.5	22.2	920.3	0.4	2	1	none	0	0.65	0.35	0	0	0	0	0.662	0	a	0	1	1	1	1	0	0	1	0	1	0	0	0	9	0.1	1	0	1	1	0
16	THCY003	2019-06-28	10:30:00	0	dry	adult	Telemetry	1	1	517896	3576060	3	37.5	22.2	920.3	0.4	2	1	none	0	0.65	0.35	0	0	0	0	0.662	0	a	0	1	1	1	1	0	0	1	0	1	0	0	0	9	0.1	1	0	1	1	0
17	single	2019-07-02	09:50:00	1	wet	adult	VES	1	1	517749	3575146	5	34.4	26.5	921.7	0.9	0	0	none	0	0.5	0.5	0	0	0	0	0	0	a	0	1	1	1	0	1	0	0	0	1	0	1	1	4	0.1	0	0	1	1	0
18	single	2019-07-02	11:10:00	1	wet	neonate	VES	1	1	517920	3575963	8	NA	NA	NA	NA	0	0	none	0	0.5	0.5	0	0	0	0	NA	0	a	1	1	1	1	1	0	0	0	0	1	0	1	1	2	0.1	0	0	1	1	0
19	THCY002	2019-07-02	11:30:00	1	wet	adult	Telemetry	0	0	517887	3576056	5.4	35.2	24.5	918.8	0	0	0	high	0	0.5	0	0.25	0	0	0.25	0.926	1	c	0	0	1	1	1	0	NA	NA	NA	NA	NA	NA	NA	NA	NA	0	0	0	0	1
20	THCY003	2019-07-02	11:45:00	1	wet	adult	Telemetry	0	0	517893	3576072	3	35.2	24.5	918.8	0	0	0	high	0	0.5	0	0.25	0	0	0.25	0.853	0.75	c	0	0	1	1	1	0	NA	NA	NA	NA	NA	NA	NA	NA	NA	0	0	0	0	1
21	single	2019-07-02	12:05:00	1	wet	adult	VES	1	1	517844	3575866	3	NA	NA	NA	NA	0	0	none	0	0.45	0.45	0.1	0	0	0	NA	0	a	0	1	1	1	1	1	0	0	1	1	0	1	1	NA	0.1	1	0	0	0	0
22	single	2019-07-03	08:45:00	1	wet	neonate	VES	1	1	517884	3575486	3	31.6	34.3	920.5	0.2	0	0	low	0.1	0.45	0	0	0.45	0	0	0	0.25	c	0	1	0	0	0	1	NA	NA	NA	NA	NA	NA	NA	NA	NA	0	1	0	0	0
23	single	2019-07-03	09:07:00	1	wet	neonate	VES	1	1	517765	3575706	3	NA	NA	NA	NA	0	0	mid	0	0.25	0	0.75	0	0	0	NA	NA	NA	0	0	0	1	1	0	NA	NA	NA	NA	NA	NA	NA	NA	NA	0	1	0	0	0
24	THCY004	2019-07-03	09:15:00	1	wet	adult	Telemetry	1	1	517813	3575819	3	31	30.5	919.4	0.7	0	0	low	0	0	0.5	0.5	0	0	0	0	0.5	a	0	1	0	0	0	0	1	0	0	0	0	0	0	12	0	0	1	0	0	0
25	THCY005	2019-07-03	10:40:00	1	wet	adult	Telemetry	1	1	517894	3576055	3	32.8	29.8	918.4	0.6	0	0	none	0	1	0	0	0	0	0	0.662	0	c	0	1	1	1	1	0	NA	NA	NA	NA	NA	NA	NA	NA	NA	1	0	0	0	0
26	THCY002	2019-07-03	12:00:00	1	wet	adult	Telemetry	0	0	517887	3576056	5.4	37	24.7	917.8	0.2	0	0	high	0	0.5	0	0.25	0	0	0.25	0.926	1	c	0	0	1	1	1	0	NA	NA	NA	NA	NA	NA	NA	NA	NA	0	0	0	0	1
27	single	2019-07-03	12:30:00	1	wet	adult	VES	1	1	517843	3575867	5	NA	NA	NA	NA	0	0	none	0	0.5	0.5	0	0	0	0	NA	1	b	0	1	1	1	1	1	1	0	0	0	1	0	0	NA	NA	1	1	1	1	0
28	single	2019-07-08	10:10:00	1	wet	neonate	VES	1	1	518229	3576321	3	NA	NA	NA	NA	0	1	none	0	0.5	0.5	0	0	0	0	0	0	a	NA	NA	NA	NA	NA	NA	1	0	0	0	0	0	0	5	0.1	0	0	1	1	0
29	single	2019-07-08	10:15:00	1	wet	neonate	VES	1	1	518141	3576317	3	NA	NA	NA	NA	0	1	none	0	0.5	0.5	0	0	0	0	0	0	a	NA	NA	NA	NA	NA	NA	1	0	0	0	0	0	0	5	0.1	0	0	1	1	0
30	single	2019-07-08	10:15:00	1	wet	neonate	VES	1	1	518141	3576317	3	NA	NA	NA	NA	0	1	none	0	0.5	0.5	0	0	0	0	0	0	a	NA	NA	NA	NA	NA	NA	1	0	0	0	0	0	0	5	0.1	0	0	1	1	0
31	single	2019-07-08	10:15:00	1	wet	neonate	VES	1	1	518141	3576317	3	NA	NA	NA	NA	0	1	none	0	0.5	0.5	0	0	0	0	0	0	a	NA	NA	NA	NA	NA	NA	1	0	0	0	0	0	0	5	0.1	0	0	1	1	0
32	single	2019-07-08	10:15:00	1	wet	neonate	VES	1	1	518141	3576317	3	NA	NA	NA	NA	0	1	none	0	0.5	0.5	0	0	0	0	0	0	a	NA	NA	NA	NA	NA	NA	1	0	0	0	0	0	0	5	0.1	0	0	1	1	0
33	single	2019-07-08	10:15:00	1	wet	neonate	VES	1	1	518141	3576317	3	NA	NA	NA	NA	0	1	none	0	0.5	0.5	0	0	0	0	0	0	a	NA	NA	NA	NA	NA	NA	1	0	0	0	0	0	0	5	0.1	0	0	1	1	0
34	THCY005	2019-07-08	10:54:00	1	wet	adult	Telemetry	0	0	517896	3576080	3	NA	NA	NA	NA	0	1	low	0	0.75	0	0	0	0	0.25	0.103	1	d	0	1	1	1	1	0	NA	NA	NA	NA	NA	NA	NA	NA	NA	0	0	0	0	1
35	THCY002	2019-07-08	11:15:00	1	wet	adult	Telemetry	0	0	517897	3575967	3	NA	NA	NA	NA	0	1	high	0	0.25	0	0	0	0.75	0	1	0.75	d	0	1	1	1	0	0	NA	NA	NA	NA	NA	NA	NA	NA	NA	0	0	0	0	1
36	THCY004	2019-07-08	11:55:00	1	wet	adult	Telemetry	0	0	517795	3575768	3	NA	NA	NA	NA	0	1	low	0	0.35	0	0.1	0	0	0.55	0	0.75	d	0	0	1	1	1	0	NA	NA	NA	NA	NA	NA	NA	NA	NA	0	0	0	0	1
37	single	2019-07-08	12:20:00	1	wet	neonate	VES	1	1	517814	3575373	3	NA	NA	NA	NA	0	1	low	0	0	0.5	0	0	0	0.5	NA	1	b	NA	NA	NA	NA	NA	NA	1	0	0	0	0	1	0	NA	0.1	0	0	1	1	0
38	THCY004	2019-07-10	12:00:00	1	wet	adult	Telemetry	0	0	517784	3575766	3	37.5	20.3	921.6	0	0	0	none	0.25	0.25	0	0.5	0	0	0	0	1	d	0	1	0	0	1	0	NA	NA	NA	NA	NA	NA	NA	NA	NA	0	0	0	0	1
39	single	2019-07-11	08:25:00	1	wet	neonate	VES	1	1	517856	3575472	8	NA	NA	NA	NA	2	0	none	0	0.5	0	0.5	0	0	0	1	1	d	0	1	1	1	1	0	0	0	0	0	0	0	1	0	NA	1	1	0	0	0
40	THCY006	2019-07-11	08:45:00	1	wet	adult	VES	1	1	517776	3575719	3	32.2	28.1	921.8	0.2	1	0	none	0	0	0.5	0	0	0	0.5	0	0.5	b	0	1	0	0	1	0	1	0	0	0	0	1	0	20	0	0	1	1	0	0
41	single	2019-07-11	08:45:00	1	wet	neonate	VES	1	1	517773	3575721	7	32.2	28.1	921.8	0.2	1	0	none	0	0	0.5	0	0	0	0.5	0	0.5	b	0	1	0	0	1	0	1	0	0	0	0	1	0	20	0	0	0	1	1	0
42	single	2019-07-11	08:45:00	1	wet	neonate	VES	1	1	517773	3575721	7	32.2	28.1	921.8	0.2	1	0	none	0	0	0.5	0	0	0	0.5	0	0.5	b	0	1	0	0	1	0	1	0	0	0	0	1	0	20	0	0	0	1	1	0
43	THCY007	2019-07-11	11:30:00	1	wet	adult	VES	1	1	517843	3575860	3	37.3	19.8	920.6	0	1	0	none	0	0.25	0.75	0	0	0	0	0.353	0	a	0	1	1	1	1	0	1	0	0	0	0	0	0	14	0.1	0	0	1	1	0
44	single	2019-07-12	10:00:00	1	wet	neonate	VES	NA	NA	517876	3575491	3	NA	NA	NA	NA	NA	NA	NA	NA	NA	NA	NA	NA	NA	NA	NA	NA	NA	NA	NA	NA	NA	NA	NA	NA	NA	NA	NA	NA	NA	NA	NA	NA	NA	NA	NA	NA	NA
45	single	2019-07-12	10:00:00	1	wet	neonate	VES	NA	NA	517876	3575491	3	NA	NA	NA	NA	NA	NA	NA	NA	NA	NA	NA	NA	NA	NA	NA	NA	NA	NA	NA	NA	NA	NA	NA	NA	NA	NA	NA	NA	NA	NA	NA	NA	NA	NA	NA	NA	NA
46	single	2019-07-12	10:30:00	1	wet	neonate	VES	NA	NA	517783	3575718	3	NA	NA	NA	NA	NA	NA	NA	NA	NA	NA	NA	NA	NA	NA	NA	NA	NA	NA	NA	NA	NA	NA	NA	NA	NA	NA	NA	NA	NA	NA	NA	NA	NA	NA	NA	NA	NA
47	single	2019-07-12	10:30:00	1	wet	neonate	VES	NA	NA	517783	3575718	3	NA	NA	NA	NA	NA	NA	NA	NA	NA	NA	NA	NA	NA	NA	NA	NA	NA	NA	NA	NA	NA	NA	NA	NA	NA	NA	NA	NA	NA	NA	NA	NA	NA	NA	NA	NA	NA
48	single	2019-07-12	10:40:00	1	wet	neonate	VES	1	1	517843	3575860	3	NA	NA	NA	NA	NA	NA	none	0	0.25	0.75	0	0	0	0	0.353	0	a	0	1	1	1	1	0	1	0	0	0	0	0	0	14	0.1	0	0	1	1	0
49	single	2019-07-12	10:40:00	1	wet	neonate	VES	1	1	517843	3575860	3	NA	NA	NA	NA	NA	NA	none	0	0.25	0.75	0	0	0	0	0.353	0	a	0	1	1	1	1	0	1	0	0	0	0	0	0	14	0.1	0	0	1	1	0
50	single	2019-07-12	10:40:00	1	wet	neonate	VES	1	1	517843	3575860	3	NA	NA	NA	NA	NA	NA	none	0	0.25	0.75	0	0	0	0	0.353	0	a	0	1	1	1	1	0	1	0	0	0	0	0	0	14	0.1	0	0	1	1	0
51	single	2019-07-12	10:40:00	1	wet	neonate	VES	1	1	517843	3575860	3	NA	NA	NA	NA	NA	NA	none	0	0.25	0.75	0	0	0	0	0.353	0	a	0	1	1	1	1	0	1	0	0	0	0	0	0	14	0.1	0	0	1	1	0
52	single	2019-07-18	08:30:00	1	wet	neonate	VES	1	1	517776	3575719	3	31.8	44.8	921.4	NA	2	0	none	0	0	0.5	0	0	0	0.5	0	0.5	b	0	1	0	0	1	0	1	0	0	0	0	1	0	NA	NA	1	0	0	0	0
53	single	2019-07-18	11:45:00	1	wet	neonate	VES	1	1	517843	3575860	3	34.1	37.6	919.8	0	1	0	none	0	0.25	0.75	0	0	0	0	0.353	0	a	0	1	1	1	1	0	1	0	0	0	0	0	0	NA	NA	0	0	1	1	0
54	single	2019-07-25	09:30:00	1	wet	neonate	VES	1	1	517843	3575860	3	31.1	54	923.1	0	1	1	none	0	0.25	0.75	0	0	0	0	0.353	0.75	a	0	1	1	1	1	0	1	0	0	0	0	0	0	7	0.1	1	0	1	1	0
55	single	2019-07-25	09:30:00	1	wet	neonate	VES	1	1	517843	3575860	3	31.1	54	923.1	0	1	1	none	0	0.25	0.75	0	0	0	0	0.353	0.75	a	0	1	1	1	1	0	1	0	0	0	0	0	0	7	0.1	1	0	1	1	0
56	single	2019-07-25	10:30:00	1	wet	neonate	VES	1	1	517764	3575643	5	NA	NA	NA	NA	NA	NA	NA	0	1	0	0	0	0	0	NA	0	d	0	1	1	1	1	0	0	0	0	0	0	0	1	NA	NA	1	0	0	0	0
57	single	2019-08-01	08:30:00	1	wet	neonate	VES	1	1	517776	3575719	3	NA	NA	NA	NA	0	1	none	0	0	0.5	0	0	0	0.5	0	0.5	b	0	1	0	0	1	0	1	0	0	0	0	1	0	NA	NA	NA	0	1	1	0
58	single	2019-08-01	08:30:00	1	wet	neonate	VES	1	1	517776	3575719	3	NA	NA	NA	NA	0	1	none	0	0	0.5	0	0	0	0.5	0	0.5	b	0	1	0	0	1	0	1	0	0	0	0	1	0	NA	NA	NA	0	1	1	0
59	single	2019-08-01	10:00:00	1	wet	neonate	VES	1	1	518075	3576305	10	NA	NA	NA	NA	0	1	none	0	0.5	0.5	0	0	0	0	0	NA	a	0	1	1	1	1	0	1	0	0	0	0	0	0	NA	0	1	1	1	NA	0
60	single	2019-08-01	10:00:00	1	wet	neonate	VES	1	1	518075	3576305	10	NA	NA	NA	NA	0	1	none	0	0.5	0.5	0	0	0	0	0	NA	a	0	1	1	1	1	0	1	0	0	0	0	0	0	NA	0	1	1	1	NA	0
61	single	2019-08-01	10:00:00	1	wet	neonate	VES	1	1	518075	3576305	10	NA	NA	NA	NA	0	1	none	0	0.5	0.5	0	0	0	0	0	NA	a	0	1	1	1	1	0	1	0	0	0	0	0	0	NA	0	1	1	1	NA	0
62	single	2019-08-07	09:00:00	1	wet	neonate	VES	1	1	517843	3575860	3	NA	NA	NA	NA	NA	NA	none	0	0.25	0.75	0	0	0	0	0.353	0	a	0	1	1	1	1	0	1	0	0	0	0	0	0	NA	NA	1	1	0	0	0
63	single	2019-08-08	18:45:00	1	wet	neonate	VES	1	1	518355	3576602	3	NA	NA	NA	NA	NA	NA	NA	0	0.5	0.5	0	0	0	0	0	NA	NA	NA	1	1	1	1	NA	1	0	0	0	0	0	0	NA	NA	NA	1	1	NA	0
64	single	2019-08-08	18:45:00	1	wet	neonate	VES	1	1	518355	3576602	3	NA	NA	NA	NA	NA	NA	NA	0	0.5	0.5	0	0	0	0	0	NA	NA	NA	1	1	1	1	NA	1	0	0	0	0	0	0	NA	NA	NA	1	1	NA	0
65	single	2019-08-08	18:49:00	1	wet	neonate	VES	0	0	518399	3576571	3	NA	NA	NA	NA	NA	NA	NA	0	1	0	0	0	0	0	0	NA	NA	NA	NA	NA	NA	1	NA	0	0	0	0	0	0	1	NA	NA	NA	NA	NA	NA	1
66	single	2019-08-21	09:45:00	1	wet	neonate	VES	1	1	517776	3575719	3	34.5	32.2	919.4	0.3	0	0	none	0	0	0.5	0	0	0	0.5	0	0.75	b	0	1	0	0	1	0	1	0	0	0	1	0	0	NA	NA	NA	1	0	0	0
67	single	2019-08-21	09:45:00	1	wet	neonate	VES	1	1	517776	3575719	3	34.5	32.2	919.4	0.3	0	0	none	0	0	0.5	0	0	0	0.5	0	0.75	b	0	1	0	0	1	0	1	0	0	0	1	0	0	NA	NA	NA	1	0	0	0
68	THCY008	2019-08-22	09:30:00	1	wet	adult	Telemetry	1	1	517753	3575295	3	30.8	46.3	919.5	0	0	0	high	0	0.15	0.5	0	0	0	0.35	0.382	0.75	a	0	1	1	1	0	0	1	0	0	0	0	1	0	4	0.1	0	0	1	1	0
69	single	2019-08-22	10:45:00	1	wet	neonate	VES	1	1	517753	3575295	3	30.8	46.3	919.5	0	0	0	high	0	0.15	0.5	0	0	0	0.35	0.382	0.75	a	0	1	1	1	0	0	1	0	0	0	0	1	0	4	0.1	0	0	1	1	0
70	THCY008	2019-08-23	10:15:00	1	wet	adult	Telemetry	NA	0	517752	3575288	3	NA	NA	NA	NA	NA	NA	high	0	0.15	0	0	0	0.25	0.6	1	1	c	0	1	1	1	0	0	NA	NA	NA	NA	NA	NA	NA	NA	NA	0	0	0	0	1
71	THCY008	2019-08-28	16:45:00	1	wet	adult	Telemetry	NA	0	517752	3575288	10	33.5	36.6	920.9	0.4	3	1	high	0	0.15	0	0	0	0.25	0.6	1	1	c	0	1	1	1	0	0	NA	NA	NA	NA	NA	NA	NA	NA	NA	0	0	0	0	1
72	THCY008	2019-09-05	17:20:00	1	wet	adult	Telemetry	0	0	517727	3575384	3	35.8	26.1	920.6	0	2	0	low	0	0.4	0	0.5	0	0.1	0	0.559	NA	d	0	1	1	1	1	0	NA	NA	NA	NA	NA	NA	NA	NA	NA	0	0	0	0	1
73	single	2019-09-10	19:20:00	1	wet	immature	VES	1	1	517880	3575481	25	30.4	42.7	917.7	0	1	0	none	0	1	0	0	0	0	0	0	NA	c	0	1	1	1	0	0	NA	NA	NA	NA	NA	NA	NA	NA	NA	0	1	0	0	0
74	single	2019-09-10	20:00:00	1	wet	neonate	VES	1	1	517753	3575295	5	29.4	44	919.9	0.4	1	0	NA	NA	NA	NA	NA	NA	NA	NA	NA	NA	b	NA	NA	NA	NA	NA	NA	0	0	0	0	0	1	NA	NA	0.1	1	0	1	0	0
75	THCY009	2019-09-18	10:50:00	1	wet	adult	VES	1	1	517760	3575635	5	30.3	46.7	920.5	0	1	0	none	0	0.5	0.3	0	0.2	0	0	0.765	0.5	a	0	1	1	1	1	1	0	0	0	0	0	1	NA	26	0.1	0	0	1	0	0
76	THCY010	2019-09-19	18:15:00	1	wet	adult	Telemetry	1	1	517878	3575882	3	27.8	52.8	914.1	0	0	0	none	0	0.8	0	0.1	0	0.1	0	0	NA	c	0	1	1	1	1	1	NA	NA	NA	NA	NA	NA	NA	NA	NA	0	1	0	0	0
77	THCY011	2019-09-20	08:50:00	1	wet	adult	VES	1	1	517751	3575259	3	30.1	32.1	920.3	0	1	0	none	0	0.8	0.2	0	0	0	0	0.412	0	b	0	1	0	0	1	1	1	0	0	0	1	0	0	NA	NA	1	0	0	0	0
78	THCY006	2019-09-20	11:00:00	1	wet	adult	VES	1	1	517872	3575885	3	32.6	25.3	917.7	0.8	0	0	none	0	0.9	0.1	0	0	0	0	0.382	0	c	0	1	1	1	1	0	0	0	0	0	1	0	0	NA	NA	0	1	1	1	0
79	THCY012	2019-09-20	11:00:00	1	wet	adult	VES	1	1	517872	3575885	3	32.6	25.3	917.7	0.8	0	0	none	0	0.9	0.1	0	0	0	0	0.382	0	c	0	1	1	1	1	0	0	0	0	0	1	0	0	NA	NA	0	1	1	1	0
80	THCY010	2019-09-20	12:30:00	1	wet	adult	Telemetry	0	0	517879	3575827	3	35.9	22.6	917.3	0.2	1	0	high	0	0	0	0.7	0	0.15	0.15	0.809	0.75	d	0	1	0	0	1	0	NA	NA	NA	NA	NA	NA	NA	NA	NA	0	0	0	0	1
81	THCY010	2019-09-26	18:30:00	1	wet	adult	Telemetry	NA	NA	517900	3575791	100	24.8	59.1	918.4	0.1	1	1	NA	NA	NA	NA	NA	NA	NA	NA	NA	NA	NA	NA	NA	NA	NA	NA	NA	NA	NA	NA	NA	NA	NA	NA	NA	NA	NA	NA	NA	NA	NA
82	THCY010	2019-10-03	16:15:00	2	dry	adult	Telemetry	NA	NA	517943	3575928	NA	28.1	42.2	917.3	0.9	0	0	NA	NA	NA	NA	NA	NA	NA	NA	NA	NA	NA	NA	NA	NA	NA	NA	NA	NA	NA	NA	NA	NA	NA	NA	NA	NA	NA	NA	NA	NA	NA
83	THCY010	2019-10-04	08:09:00	2	dry	adult	Telemetry	NA	NA	517941	3575927	NA	24.6	71.7	921.5	0	1	0	NA	0	0.5	0	0	0	0.5	0	NA	NA	NA	NA	NA	NA	NA	NA	NA	NA	NA	NA	NA	NA	NA	NA	NA	NA	NA	NA	NA	NA	NA
84	THCY010	2019-10-10	17:45:00	2	dry	adult	Telemetry	NA	NA	517973	3575811	NA	28.8	27.3	916.3	0.3	0	0	NA	0	0.75	0	0	0	0.25	0	NA	NA	NA	NA	NA	NA	NA	NA	NA	NA	NA	NA	NA	NA	NA	NA	NA	NA	NA	NA	NA	NA	NA
85	single	2019-10-18	09:45:00	2	dry	neonate	VES	1	1	517833	3574962	5	25.1	52.2	918.3	0.5	2	0	NA	0	0	1	0	0	0	0	NA	1	c	NA	NA	NA	NA	NA	NA	NA	NA	NA	NA	NA	NA	NA	NA	NA	1	0	0	0	0
86	THCY013	2019-10-18	11:20:00	2	dry	adult	VES	1	0	517783	3575766	3	25.5	41.1	916.4	0.6	1	0	none	0	0.65	0.35	0	0	0	0	0.353	0	b	0	1	1	1	1	0	0	0	1	0	0	1	0	NA	NA	1	0	0	0	1
87	THCY010	2019-10-18	12:45:00	2	dry	adult	Telemetry	0	0	517921	3575890	NA	28.5	34.8	915.7	0	1	0	none	0	0	0	1	0	0	0	0	1	d	NA	NA	NA	NA	NA	NA	NA	NA	NA	NA	NA	NA	NA	NA	NA	1	0	0	0	1
88	THCY010	2019-10-25	12:55:00	2	dry	adult	Telemetry	0	0	517921	3575890	NA	25	15.6	922.4	1.7	0	0	none	0	0	0	1	0	0	0	0	1	d	NA	NA	NA	NA	NA	NA	NA	NA	NA	NA	NA	NA	NA	NA	NA	NA	NA	NA	NA	NA
89	THCY010	2019-10-29	12:30:00	2	dry	adult	Telemetry	0	0	517921	3575890	NA	NA	NA	NA	NA	NA	NA	none	0	0	0	1	0	0	0	0	1	d	NA	NA	NA	NA	NA	NA	NA	NA	NA	NA	NA	NA	NA	NA	NA	NA	NA	NA	NA	NA
90	THCY012	2019-11-07	16:50:00	2	dry	adult	VES	1	1	517903	3575963	9	24.7	42.5	922.7	0	1	1	mid	0	0.33	0	0.33	0	0.33	0	0.25	NA	d	0	1	1	1	0	0	NA	NA	NA	NA	NA	NA	NA	NA	NA	1	0	0	0	0
91	THCY010	2019-11-07	17:15:00	2	dry	adult	Telemetry	NA	NA	517903	3575963	10	24.7	42.5	922.7	0	1	1	NA	NA	NA	NA	NA	NA	NA	NA	NA	NA	d	NA	NA	NA	NA	NA	NA	NA	NA	NA	NA	NA	NA	NA	NA	NA	NA	NA	NA	NA	NA
92	THCY010	2019-11-12	13:50:00	2	dry	adult	Telemetry	NA	NA	517905	3575953	7	24.6	31.2	921.5	0.7	0	0	mid	0	0.33	0	0	0.33	0.34	0	0	1	d	0	1	1	1	1	0	NA	NA	NA	NA	NA	NA	NA	NA	NA	NA	NA	NA	NA	NA
93	single	2020-04-08	09:45:00	0	dry	adult	VES	1	0	517927	3575984	3	25.8	30.1	921	0.1	2	0	none	0	0.85	0	0.1	0.05	0	0	0.324	NA	c	0	1	1	1	0	0	NA	NA	NA	NA	NA	NA	NA	NA	NA	1	1	0	0	0
94	THCY014	2021-07-07	08:24:00	1	wet	adult	VES	1	1	517752	3575347	3	32	51	921.1	0	1	0	high	0.1	0.25	0.5	0	0.15	0	0	0.382	0	b	0	1	0	0	0	1	0	1	0	0	0	1	0	10	0.1	0	0	1	0	0
95	single	2021-07-07	09:55:00	1	wet	neonate	VES	NA	NA	518073	3576300	6	34.6	44.4	918.5	0	1	0	NA	NA	NA	NA	NA	NA	NA	NA	0.191	NA	NA	NA	NA	NA	NA	NA	NA	NA	NA	NA	NA	NA	NA	NA	26	NA	NA	NA	NA	NA	NA
96	single	2021-07-13	08:44:00	1	wet	neonate	VES	1	1	517753	3575330	3	NA	NA	NA	NA	0	0	high	0	0.33	0.33	0	0.34	0	0	1	1	b	0	0	0	0	0	1	0	0	0	0	0	1	0	1	0.1	1	NA	NA	NA	NA
97	single	2021-07-13	08:59:00	1	wet	neonate	VES	1	1	517756	3575325	3	NA	NA	NA	NA	0	0	none	0.5	0	0.5	0	0	0	0	0	0	b	0	1	0	0	0	0	1	0	0	0	0	1	0	1	0.1	0	1	1	0	0
98	single	2021-10-22	10:40:00	2	dry	adult	VES	1	1	517802	3575600	3	31.6	30.2	922.2	0.2	0	0	high	0	0.45	0.1	0.45	0	0	0	0.662	0.5	b	0	1	1	1	0	0	0	0	0	1	0	0	0	NA	NA	0	1	0	0	0
99	single	2021-11-12	10:45:00	2	dry	adult	VES	1	1	517824	3575837	3	36.6	21.6	926.3	0	0	0	high	0	0.4	0	0.25	0.25	0	0.1	0.985	NA	c	0	1	1	1	1	0	NA	NA	NA	NA	NA	NA	NA	NA	NA	NA	1	0	0	0
100	single	2021-11-12	11:00:00	2	dry	adult	VES	1	1	517824	3575837	3	36.6	21.6	926.3	0	0	0	high	0	0.85	0	0	0.15	0	0	0.529	NA	c	0	1	1	1	1	0	NA	NA	NA	NA	NA	NA	NA	NA	NA	1	1	0	0	0
101	single	2021-11-12	11:15:00	2	dry	adult	VES	1	1	517824	3575837	3	36.6	21.6	926.3	0	0	0	high	0	0.4	0	0.25	0.25	0	0.1	0.985	NA	c	0	1	1	1	1	0	NA	NA	NA	NA	NA	NA	NA	NA	NA	1	1	0	0	0
102	single	2021-11-12	11:15:00	2	dry	adult	VES	1	1	517824	3575837	3	36.6	21.6	926.3	0	0	0	high	0	0.4	0	0.25	0.25	0	0.1	0.985	NA	c	0	1	1	1	1	0	NA	NA	NA	NA	NA	NA	NA	NA	NA	1	1	0	0	0
103	single	2021-11-12	12:30:00	2	dry	adult	VES	1	0	517905	3575997	3	37.8	16	924.3	0	0	0	high	0	0.5	0	0.5	0	0	0	0.926	0.25	c	0	0	1	1	0	0	NA	NA	NA	NA	NA	NA	NA	NA	NA	1	0	0	0	0

## Sheet: THCY_size
age	sex	SVL (mm)	mass (g)	logM/logSVL	tail (mm)
neonate	NA	180	3.5	0.241243	tail = 61
neonate	NA	210	4	0.259261	tail = 60
neonate	NA	210	4.5	0.281288	tail = 65
immature	M	390	20.8	0.508696	tail = 120
adult	NA	490	45	0.614532	tail = 140
immature	NA	300	10	0.403694	tail = 60; "pinched off" tail damage
neonate	NA	210	4.2	0.268385	NA
adult	F	490	48.7	0.627288	NA
neonate	NA	165	2.2	0.154419	NA
adult	M	475	52.2	0.641714	tail = 170
adult	M	475	54.2	0.647814	tail = 159
neonate	NA	210	5.2	0.308327	NA
adult	F	565	71	0.672684	NA
adult	F	551	43.2	0.596641	NA
adult	M	480	36.2	0.581338	NA
adult	M	415	31.2	0.570713	NA
adult	F	450	57.7	0.66379	NA
immature	NA	NA	15.2	NA	NA
adult	F	490	41.1	0.599897	NA
adult	M	495	72.2	0.689725	NA
adult	F	439	33.2	0.575651	NA
adult	M	460	47.2	0.62865	NA
adult	M	480	49	0.630378	NA
neonate	NA	NA	2.5	NA	NA
adult	M	466	53.2	0.6468	tail = 166
